# Supplementary material for: Machine Learning for Evaluating the Cytotoxicity of Mixtures of Nano-TiO2 and Heavy Metals: QSAR Model Apply Random Forest Algorithm after Clustering Analysis
Source: MDPI journal article supplement (doi:10.3390/molecules27186125), 2022-09-19
Supplement: s1 [file s1]

## Supplementary material

Refer to Table S2 for specific formulas for deducing descriptors.

Refer to Table S3 for specific formulas for model verification.

Refer to Figure S1 for the comparison of observed and predicted values of PLS.

Refer to Figure S2 for the application domain of PLS.

Refer to Figure S3 for the ROS value.

**Table S2 Specific formulas for deducing descriptors**

| Descriptor                 | Formula                                     | Description                                                                                          |
|----------------------------|---------------------------------------------|------------------------------------------------------------------------------------------------------|
| Ionization potential       | $I=E_c^{N-1} - E_0^N$                       | $E_c^{N-1}$ is the energy after losing one electron<br>$E_0^N$ is the basal state energy(neutral)    |
| Electron affinity          | $A=E_0^N - E_A^{N+1}$                       | $E_A^{N+1}$ is the energy after gaining one electron                                                 |
| Absolute electronegativity | $u=\frac{I+A}{2}$                           | u is absolute electronegativity<br>I is ionization potential                                         |
| Absolute hardness          | $\eta=\frac{I-A}{2}$                        | A is electron affinity<br>$\eta$ is absolute hardness                                                |
| Adsorption energy          | $\Delta E_{ads}=E_{tot} - \sum_{i=1}^n E_i$ | $E_{tot}$ is the total energy of mixture<br>$\sum_{i=1}^n E_i$ is the sum of energy of all materials |

**Table S3 Specific formulas for model verification**

| Index       | Formula                                                                                                                          | Description                                                                                   |
|-------------|----------------------------------------------------------------------------------------------------------------------------------|-----------------------------------------------------------------------------------------------|
| $R^2$       | $R^2 = 1 - \frac{\sum_{i=1}^n (y_i - \hat{y}_i)^2}{\sum_{i=1}^n (y_i - \bar{y}_i)^2}$                                            | $y_i$ is the observed value<br>$\hat{y}_i$ is the predicted value                             |
| RMSE        | $RMSE = \sqrt{\frac{\sum_{i=1}^n (y_i - \hat{y}_i)^2}{n}}$                                                                       | $\bar{y}_i$ is the average value of the observed values<br>n is the number of samples         |
| $Q_{L00}^2$ | $Q_{L00}^2 = 1 - \frac{\sum_{i=1}^n (y_i - \hat{y}_i)^2}{\sum_{i=1}^n (y_i - \bar{y}_i)^2}$                                      | $\bar{y}_{TR}$ is the average value of the observed values in the training set                |
| $Q_{F1}^2$  | $Q_{F1}^2 = 1 - \frac{\sum_{i=1}^{n_{EXT}} (\hat{y}_i - y_i)^2}{\sum_{i=1}^{n_{EXT}} (y_i - \bar{y}_{TR})^2}$                    | $\bar{y}_{EXT}$ is the average value of the observed values in the test set                   |
| $Q_{F2}^2$  | $Q_{F2}^2 = 1 - \frac{\sum_{i=1}^{n_{EXT}} (\hat{y}_i - y_i)^2}{\sum_{i=1}^{n_{EXT}} (y_i - \bar{y}_{EXT})^2}$                   | $n_{TR}$ is the number of training set samples<br>$n_{EXT}$ is the number of test set samples |
| $Q_{F3}^2$  | $Q_{F3}^2 = 1 - \frac{\sum_{i=1}^{n_{EXT}} (\hat{y}_i - y_i)^2 / n_{EXT}}{\sum_{i=1}^{n_{EXT}} (y_i - \bar{y}_{TR})^2 / n_{TR}}$ |                                                                                               |

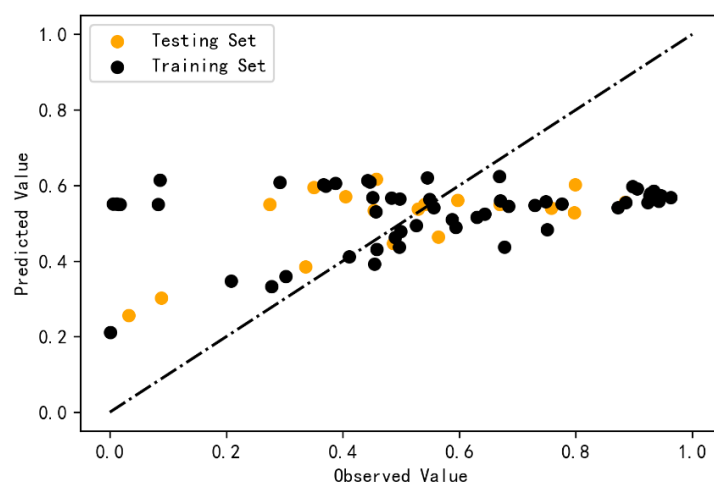

**Figure S1 Comparison of observed and predicted values of PLS**

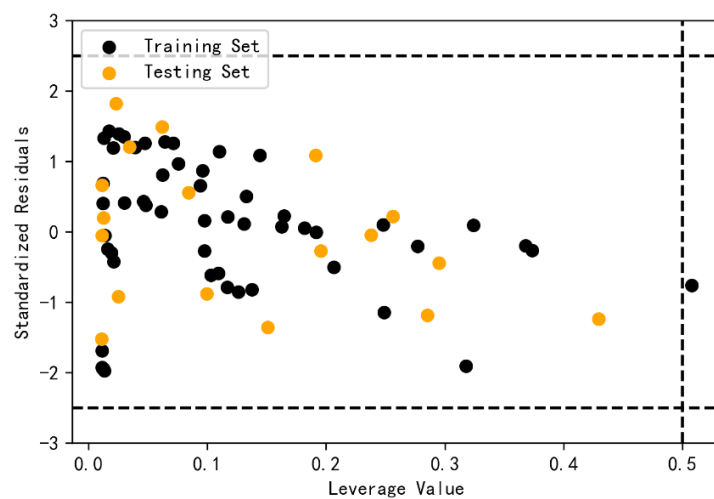

**Figure S2 Application domain of PLS**

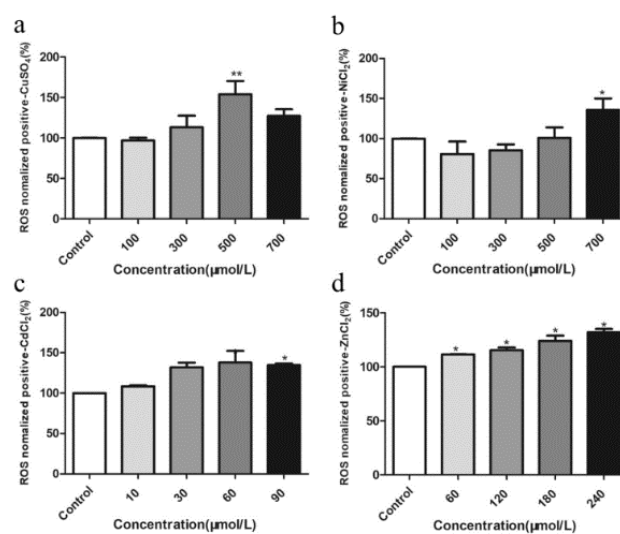

**Figure S3 ROS value**
